# Supplementary material for: Analysis of the evolution of resistance to multiple antibiotics enables prediction of the Escherichia coli phenotype-based fitness landscape
Source: PubMed Central journal article supplement (PMC9746992; doi:10.1371/journal.pbio.3001920), 2022-12-13

## A: Parent in TET selection

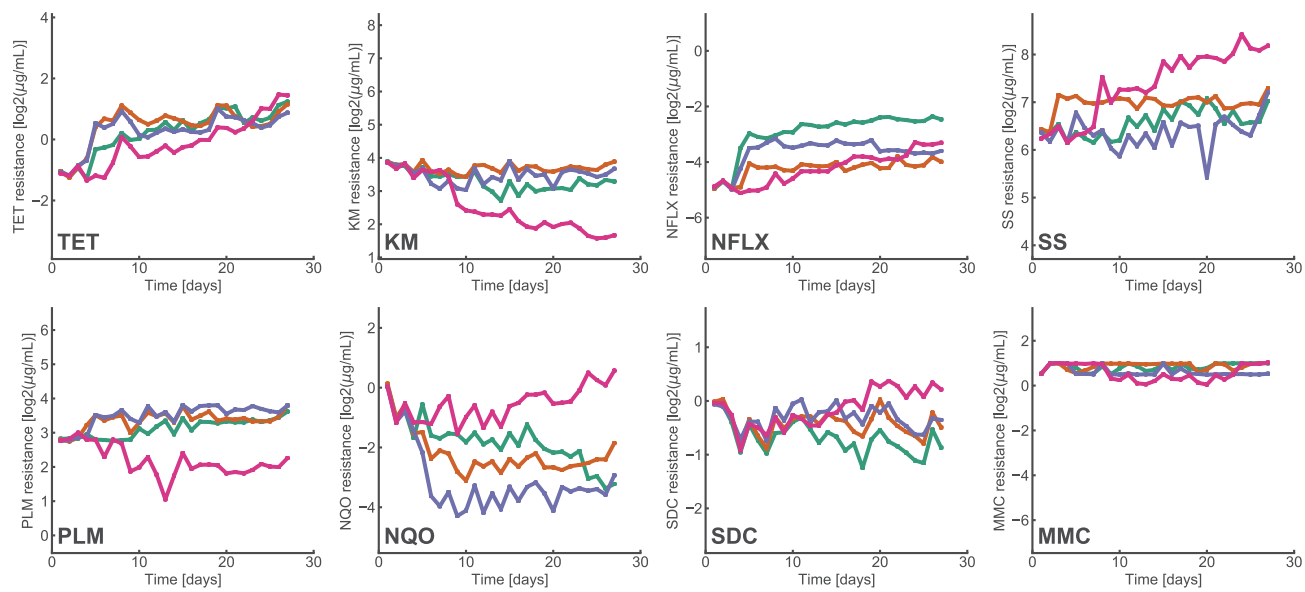

## B: KME1 in TET selection

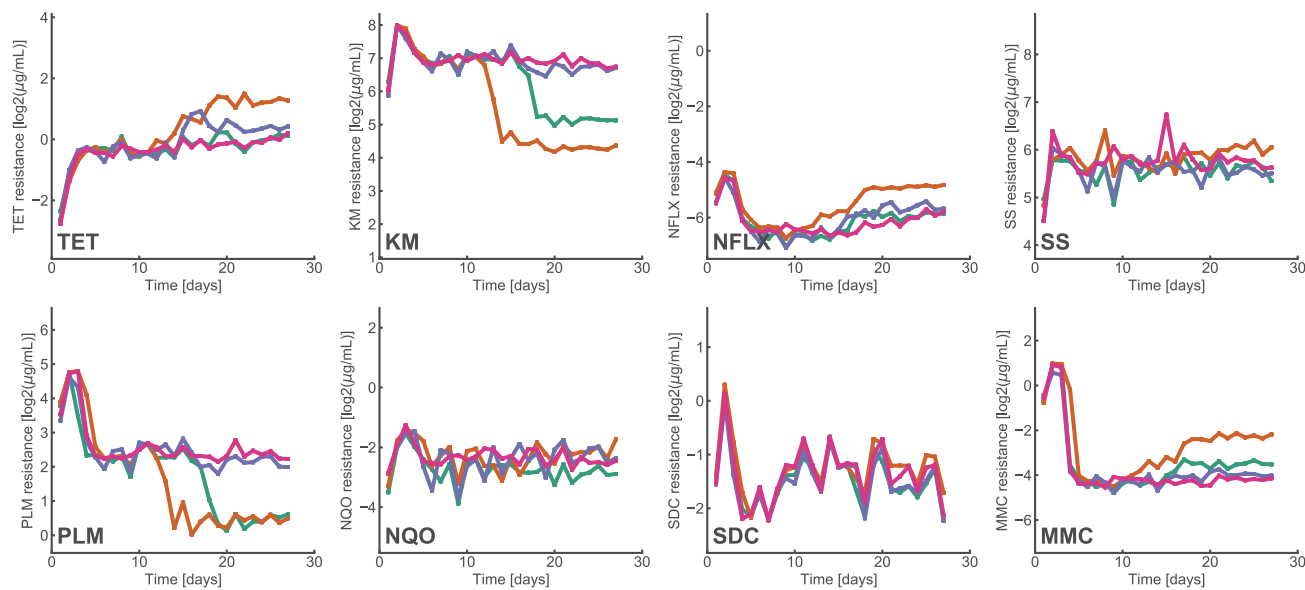

## C: KME5 in TET selection

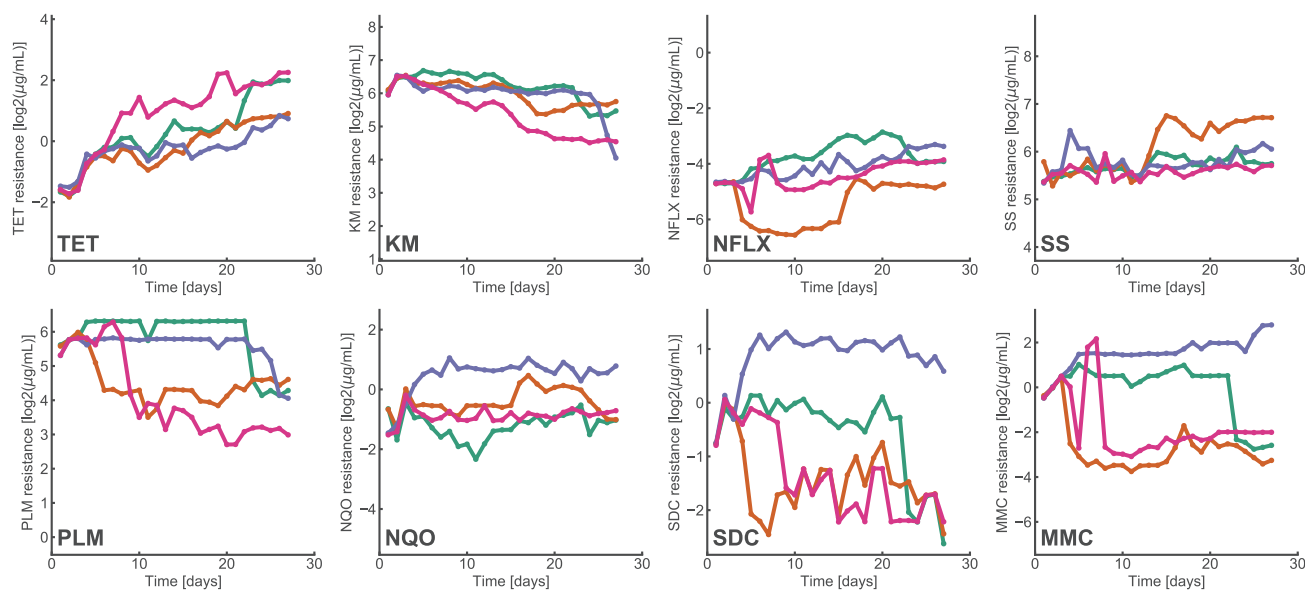

## D: Parent in KM selection

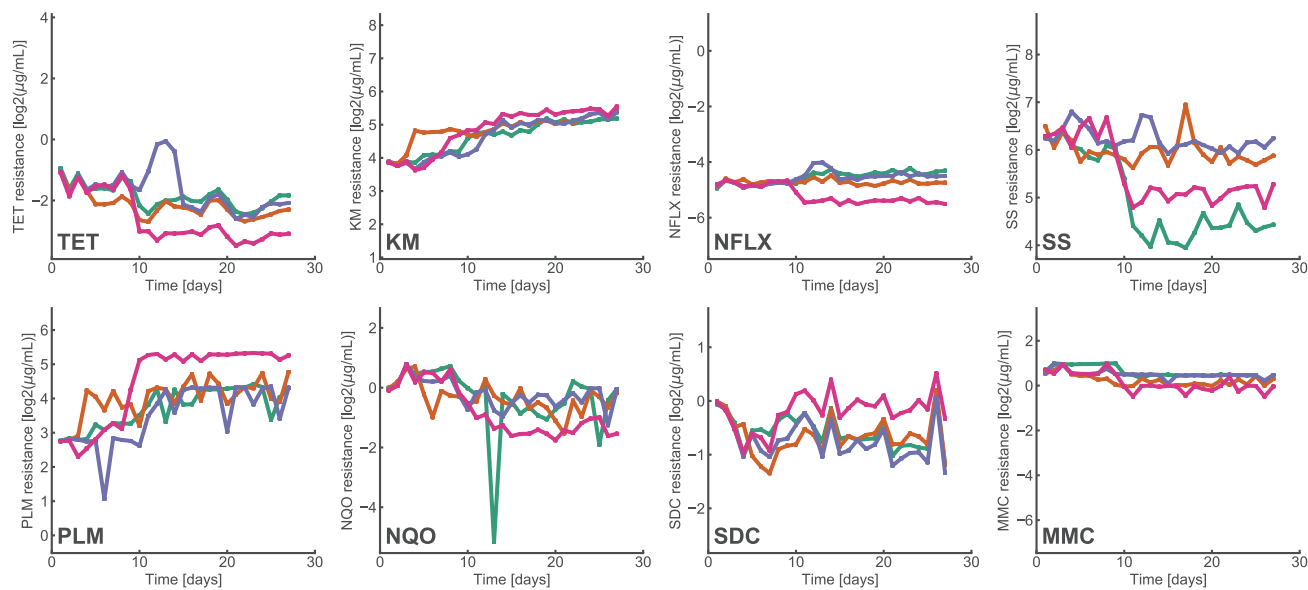

## E: TETE4 in KM selection

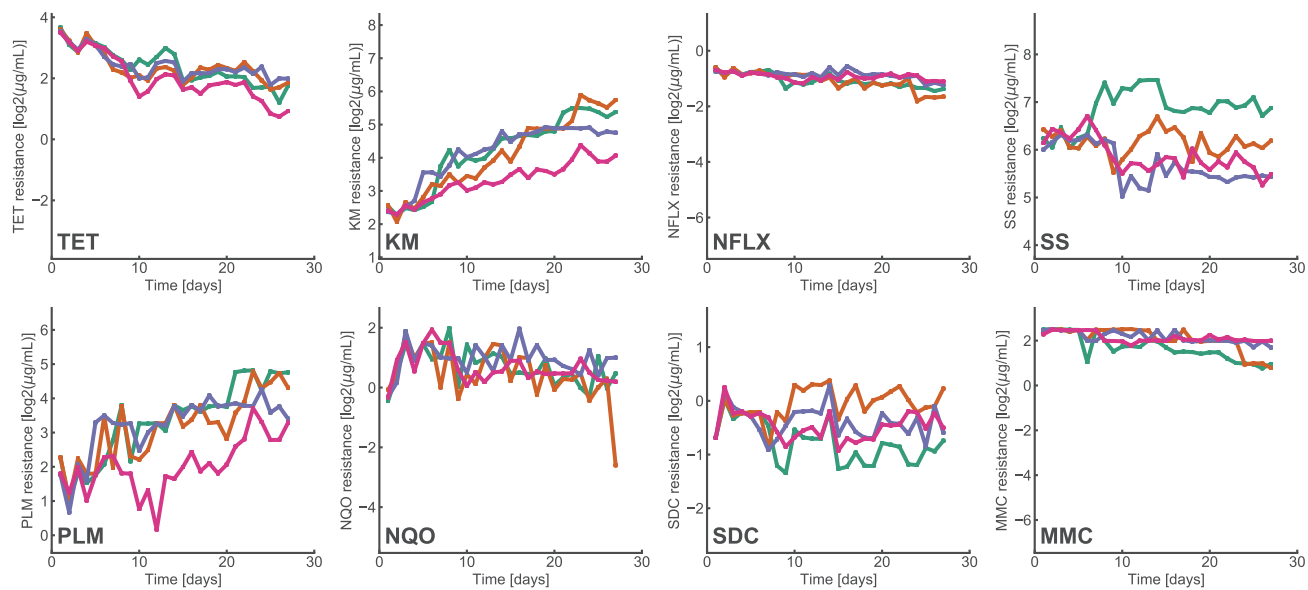

## F: TETE6 in KM selection

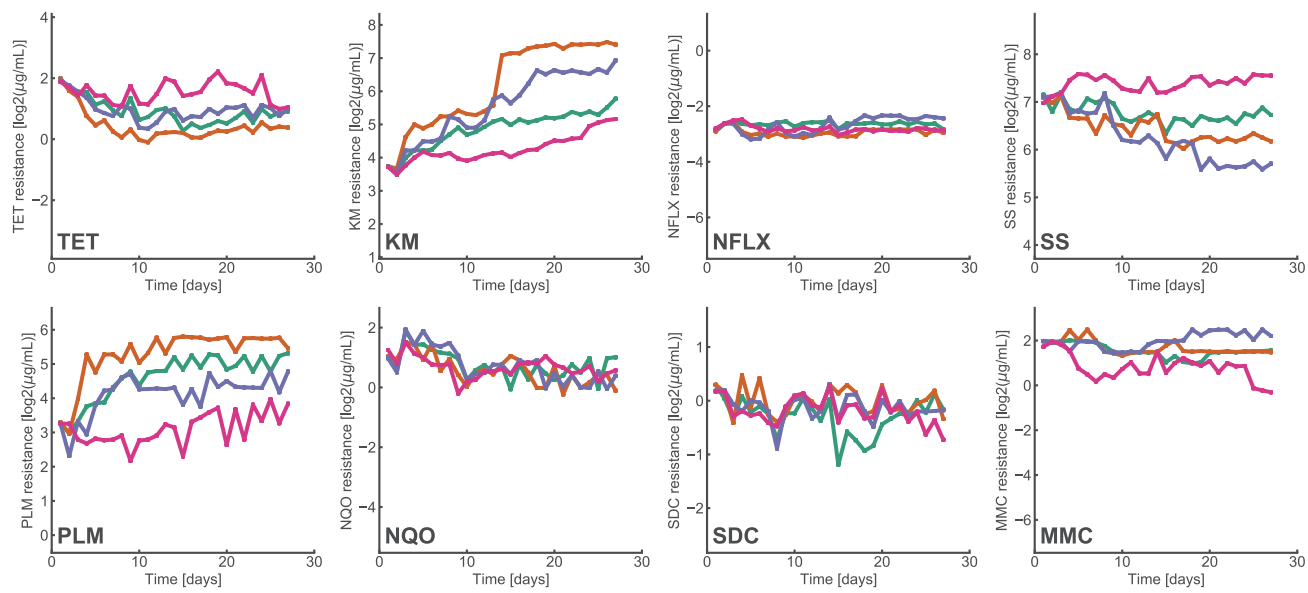

## G: NFLX4 in KM selection

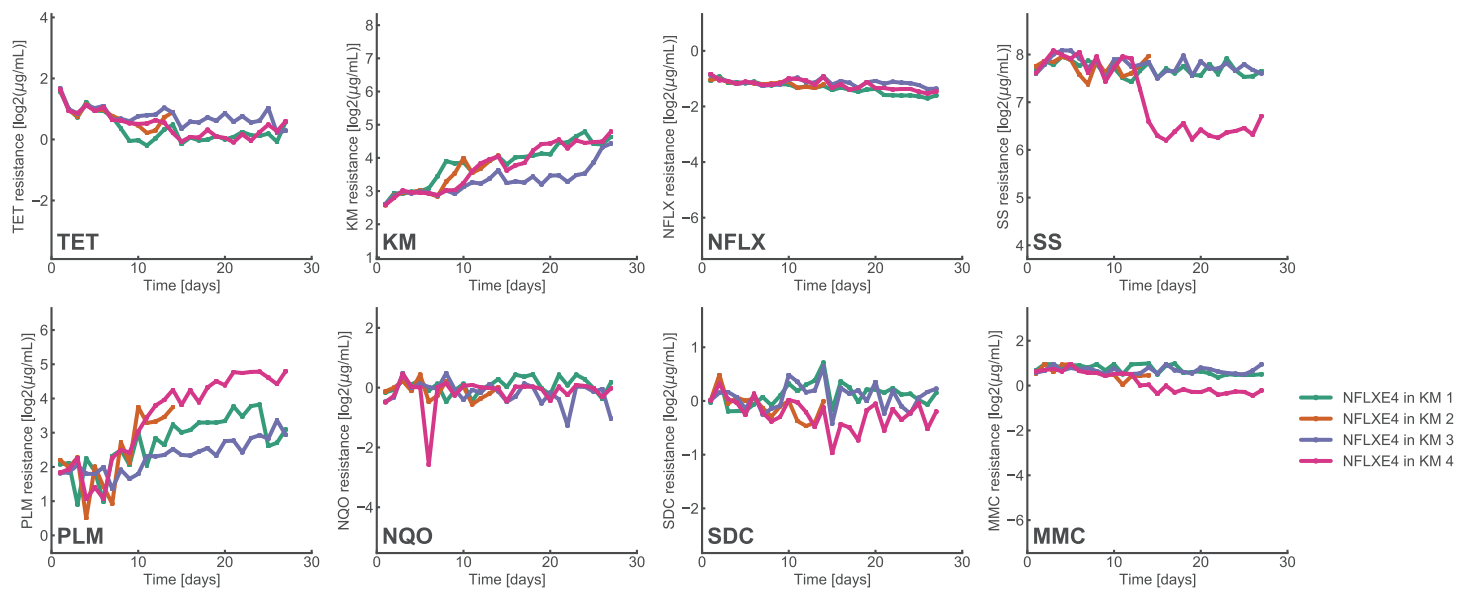

## H: NFLX6 in KM selection

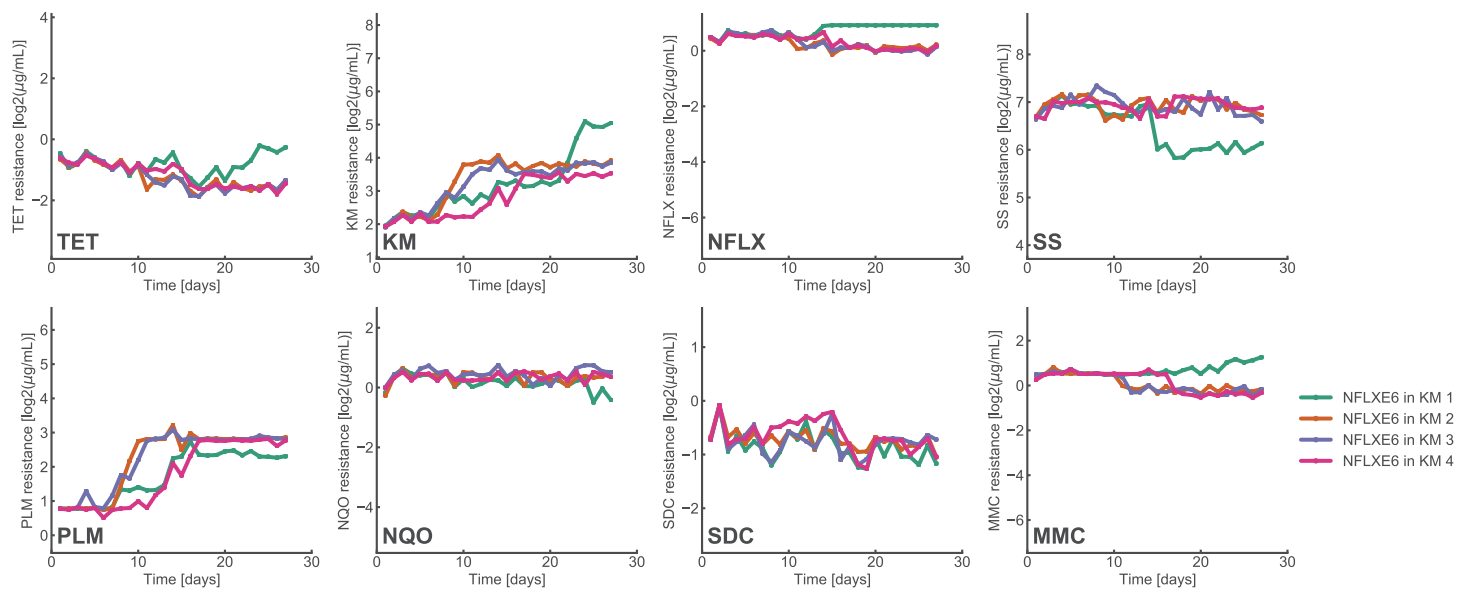

## I: Parent in NFLX selection

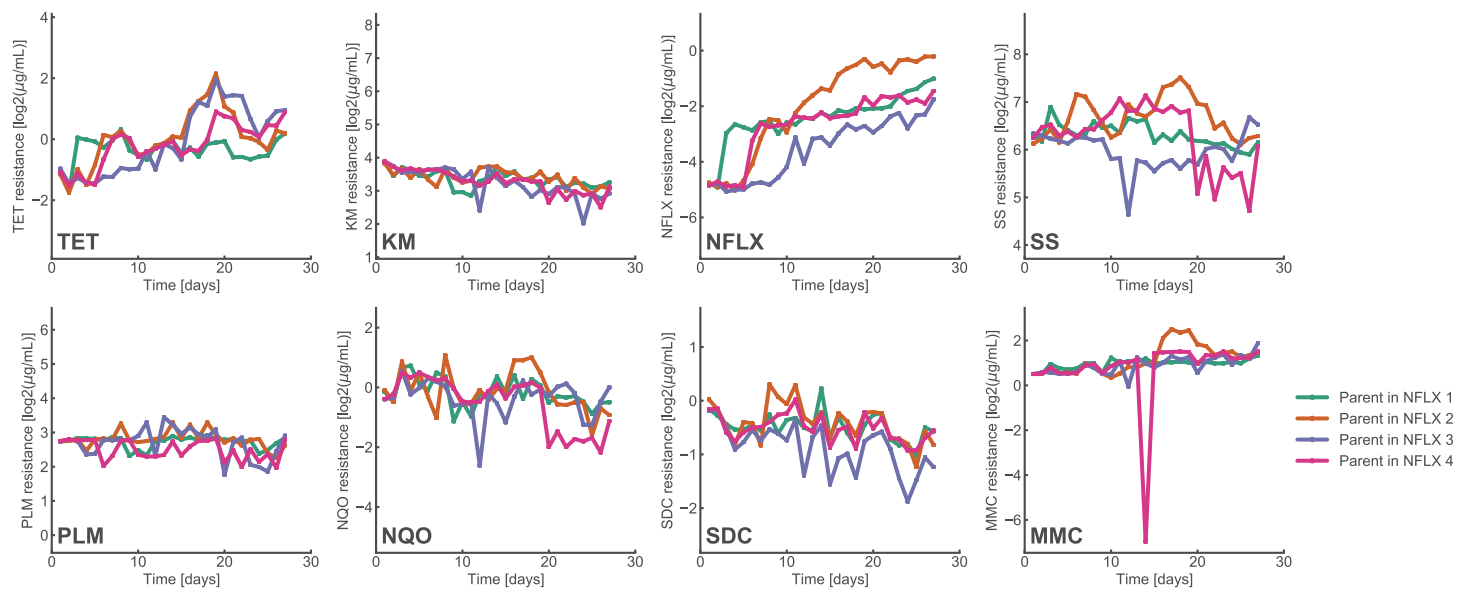

## J: KME1 in NFLX selection

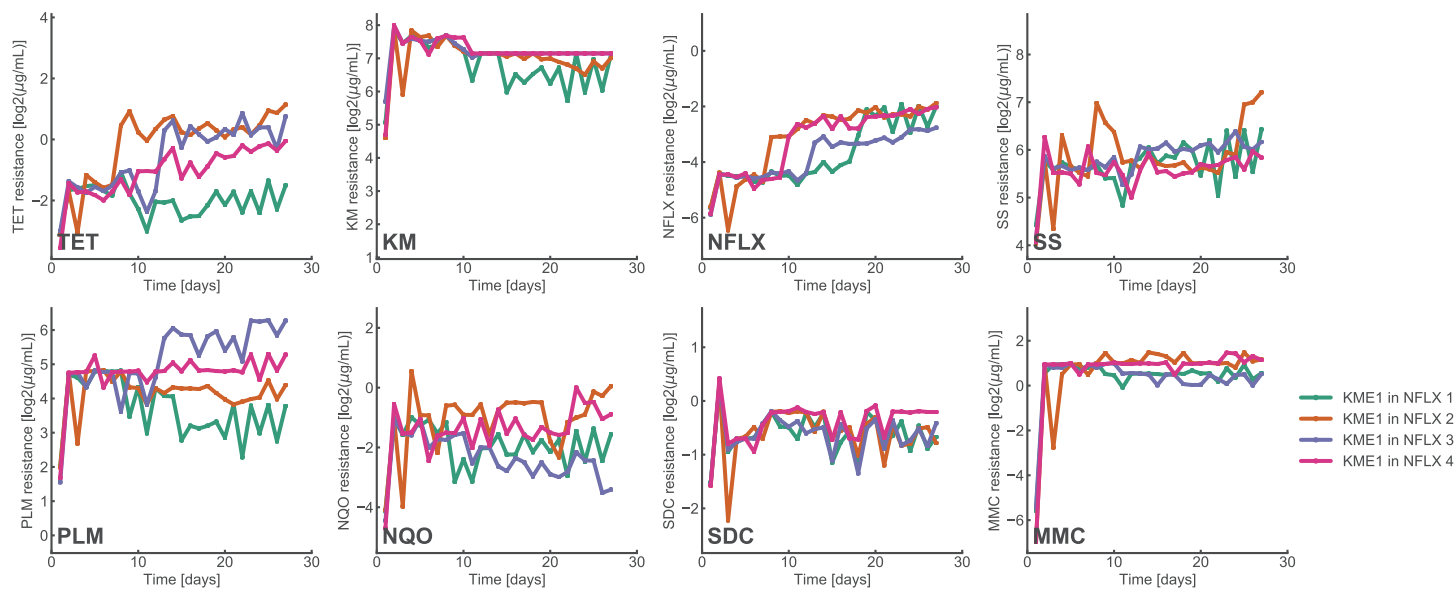

## K: KME5 in NFLX selection

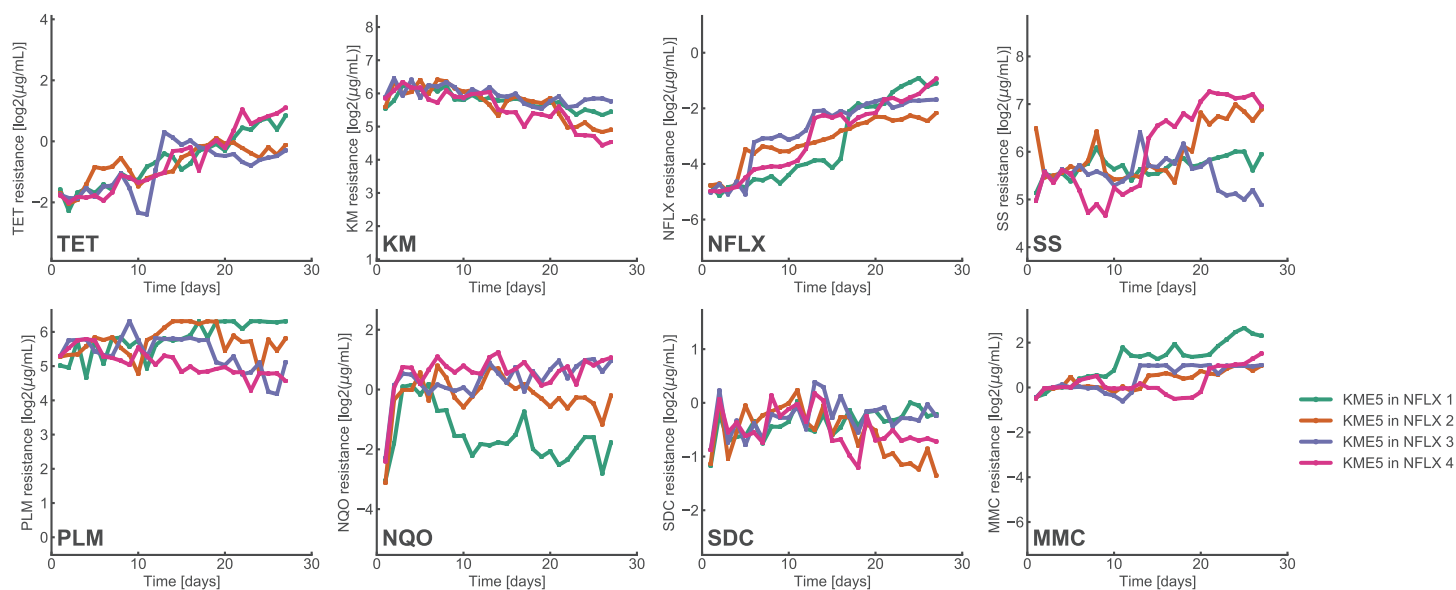

## L: Parent in M9 (No selection)

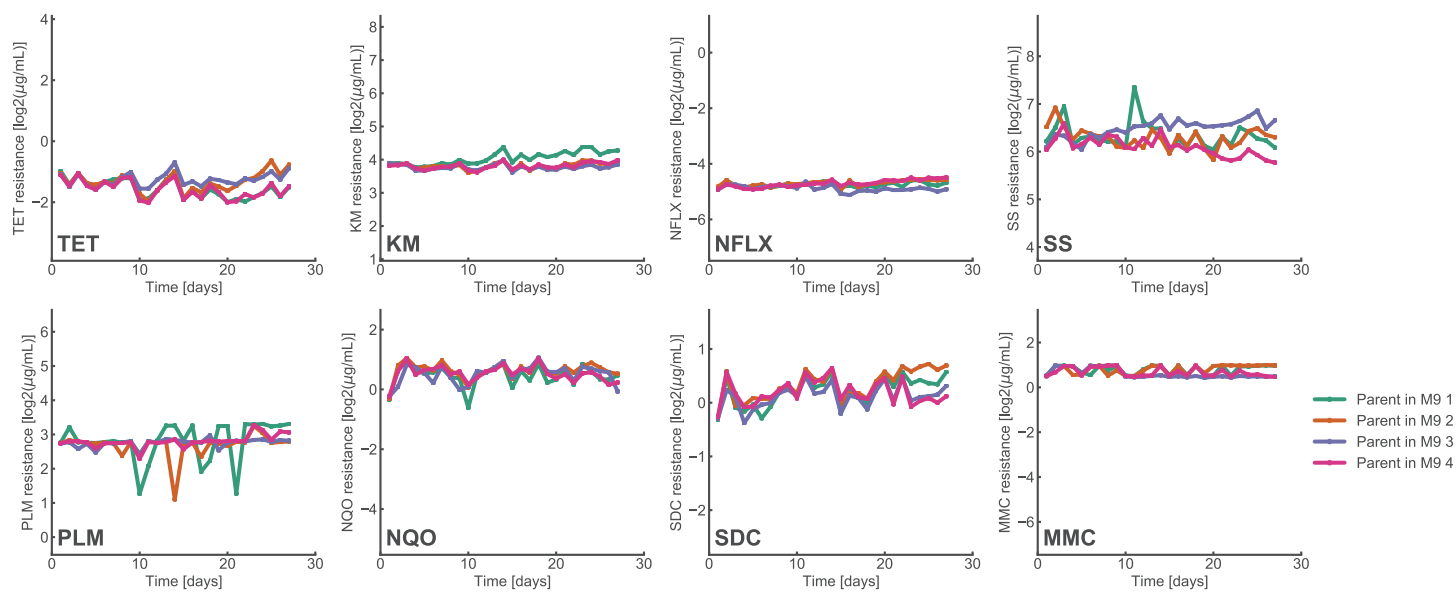

Supplement: pbio.3001920.s001.pdf [file pbio.3001920.s001.pdf]
