# Supplementary material for: Analysis of the evolution of resistance to multiple antibiotics enables prediction of the Escherichia coli phenotype-based fitness landscape
Source: PubMed Central journal article supplement (PMC9746992; doi:10.1371/journal.pbio.3001920), 2022-12-13

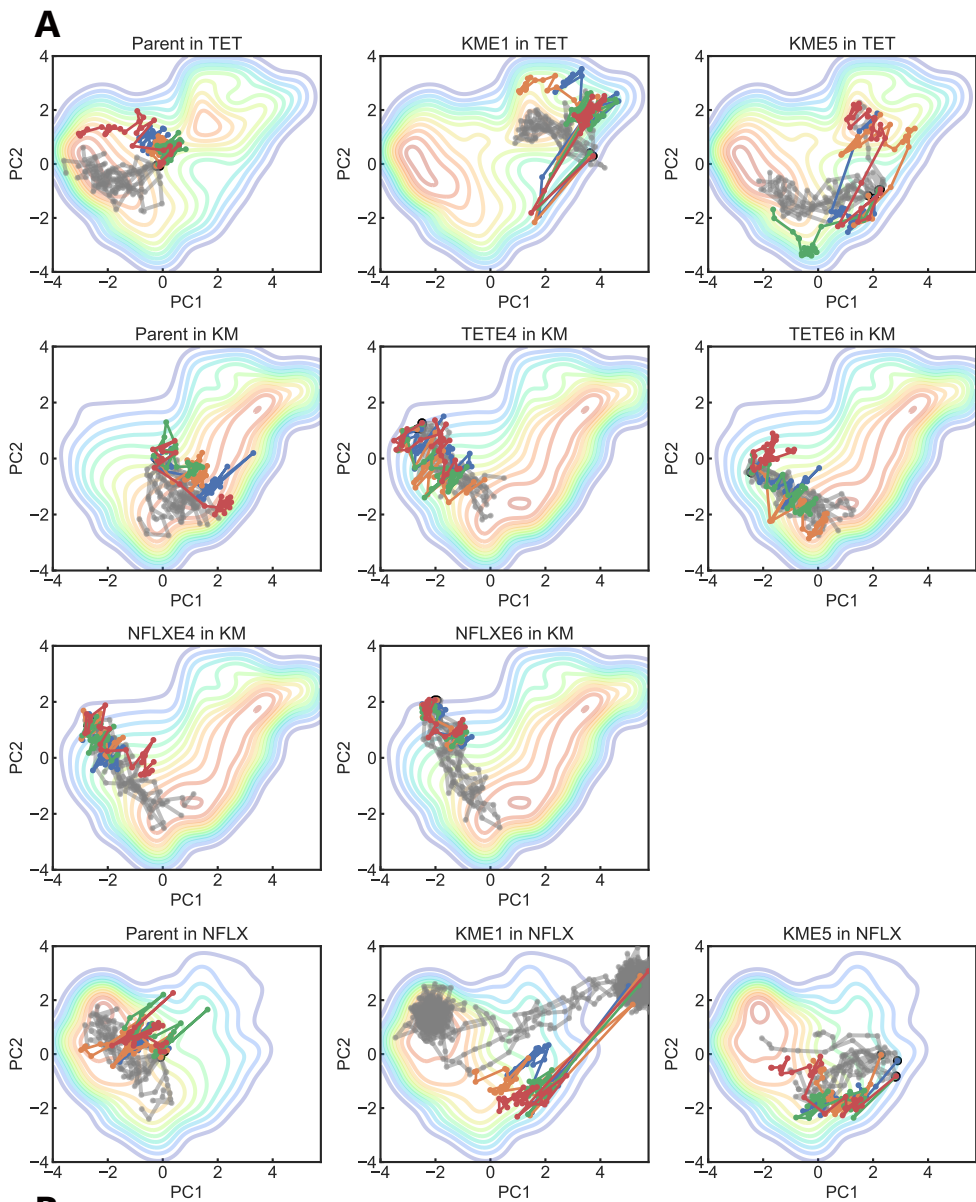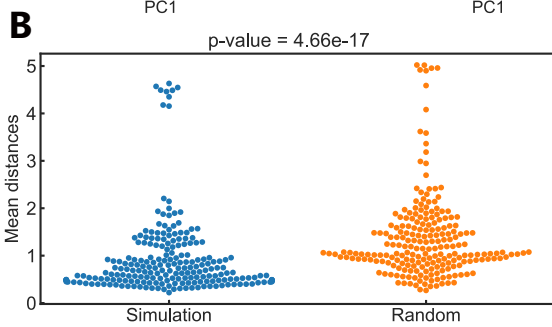

Supplement: pbio.3001920.s003.pdf [file pbio.3001920.s003.pdf]
